# Supplementary material for: Single-cell isotope tracing reveals functional guilds of bacteria associated with the diatom Phaeodactylum tricornutum
Source: PubMed Central journal article supplement (PMC10499878; doi:10.1038/s41467-023-41179-9), 2023-09-13
Supplement: 41467_2023_41179_MOESM3_ESM.pdf [file 41467_2023_41179_MOESM3_ESM.pdf]

## **Description of Additional Supplementary Files:**

**Supplementary Data 1:** expansion of Table 1, which includes calculated bacterial biovolumes and C and N content

**Supplementary Data 2:** results of proteomics showing proteins expressed by *Marinobacter* and *Rhodophyticola* in co-culture with *Phaeodactylum tricornutum*

**Supplementary Data 3:** results of genomic analysis showing presence of metabolic pathways
